# Supplementary material
Source: PubMed Central journal article supplement (PMC3843043)
Supplement: NIHMS530281-supplement-01.pdf [file NIHMS530281-supplement-01.pdf]

## Supplementary Table 1

| <b>Primer name</b>     | <b>Sequence</b>            |
|------------------------|----------------------------|
| YFPfor                 | GAATTCCTGTGAGCAAGGGCG      |
| YFPrev                 | CTCGAGTTACTTGTACAGCTCGTC   |
| Mattargetfor           | GGATCCGGCCGGCAAGGCGAACAA   |
| Mattargetrev           | GAATTCACCGTCCGCCAGTTG      |
| Maturinfor             | AGTGAGGACTGCTTGCCATT       |
| Maturinrev             | GCTGACACCCATTTGTTGGT       |
| Pax6for                | GCAACCTGGCGAGCGATAAGC      |
| Pax6rev                | CCTGCCGTCTCTGGTTCCGTAGTT   |
| H4for                  | CGGGATAACATTCAGGGTATCACT   |
| H4rev                  | ATCCATGGCGGTAAGTGTCTTCCT   |
| tubb2bfor              | ACACGGCATTGATCCTACAG       |
| tubb2brev              | AGCTCCTTCGGTGTAAATGAC      |
| ncam1for               | CACAGTTCCACCAAATGC         |
| ncam1rev               | GGAATCAAGCGGTACAGA         |
| actc1for               | GCTGACAGAATGCAGAAG         |
| actc1rev               | TTGCTTGGAGGAGTGTG          |
| DrMaturinfor           | CCGCGATGAGCCACTGAGAGC      |
| DrMaturinrev           | CAAAAGGGATCCAGTGTGTGTGTGTG |
| <b>Morpholino name</b> | <b>Sequence</b>            |

---

Supplementary Table 1

| <b>Primer name</b> | <b>Sequence</b>           |
|--------------------|---------------------------|
| MatMO1             | CGTCCGCCAGTTGCTGGAAATCCAT |
| MatMO2             | TCTCTTCCCCCAATCAGCCCGCGAT |
| Pak3MO             | CAGCACTCCTCACAGCCTCCTGGC  |
| CoMO               | Random 25-mer             |
