# Supplementary material
Source: PubMed Central journal article supplement (PMC3843043)

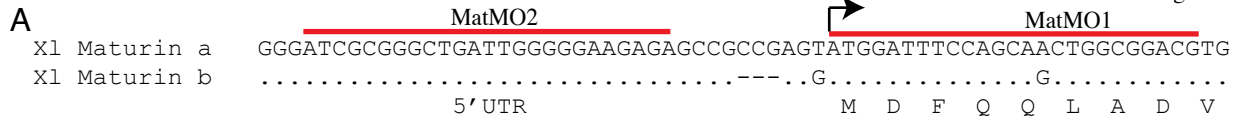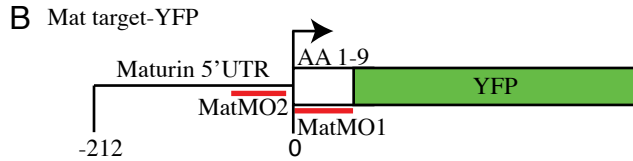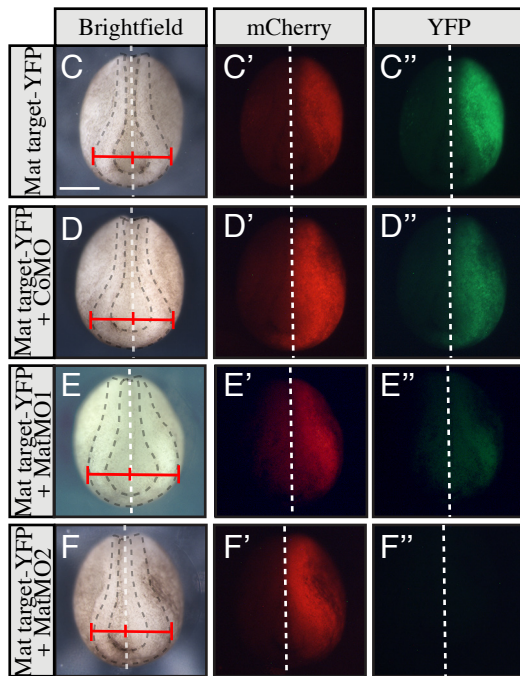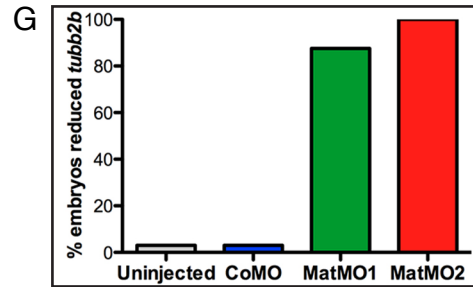

Supplement: NIHMS530281-supplement-02.pdf [file NIHMS530281-supplement-02.pdf]
